# Supplementary material for: Conventional vs. direct vs. electrochemical lithium extraction: a holistic TEA–LCA of lithium carbonate production from spodumene
Source: Royal Society of Chemistry journal article supplement (doi:10.1039/d5gc04866d), 2025-12-16
Supplement: d5gc04866d1.pdf [file d5gc04866d1.pdf]

## Supplementary Information

### Conventional vs. Direct vs. Electrochemical Lithium Extraction: A Holistic TEA–LCA of Lithium Carbonate Production from Spodumene

Seyedmehdi Sharifian<sup>1</sup>, Sima Nikfar<sup>1</sup>, Chandima Subasinghe<sup>2</sup>, Zohreh Iranmanesh<sup>1</sup>, Mohammad Rezaee<sup>2</sup>,  
Ehsan Vahidi<sup>1\*</sup>

*<sup>1</sup>Department of Mining and Metallurgical Engineering, Mackay School of Earth Sciences and  
Engineering, University of Nevada, Reno, NV, 89557, United States*

*<sup>2</sup>John and Wille Leone Family Department of Energy and Mineral Engineering, Center for  
Critical Minerals, EMS Energy Institute, College of Earth and Mineral Sciences, The  
Pennsylvania State University, University Park, PA 16802, United States*

E-mail address: evahidi@unr.edu

No. of Tables: 13

No. of Figures: 7

No. of Pages: 20

## 1- Life cycle assessment (LCA)

Table S1- Life Cycle Inventory: 1-ton LCE production through conventional method.

| <b>Input</b>                |               |             |                                                                                             |
|-----------------------------|---------------|-------------|---------------------------------------------------------------------------------------------|
| <b>Properties</b>           | <b>Amount</b> | <b>Unit</b> | <b>Ecoinvent Unit Process (TRACI 2008)</b>                                                  |
| <b>Materials/fuels</b>      |               |             |                                                                                             |
| Sulfuric acid               | 1.9           | ton         | Sulfuric acid {RoW} production APOS,U                                                       |
| Calcium carbonate           | 390           | kg          | Calcium carbonate, precipitated {RoW}  market for calcium carbonate, precipitated   APOS, U |
| Water                       | 12.9          | ton         | Water, decarbonised {RoW}  market for water, decarbonised   APOS, U                         |
| Lime milk                   | 278           | kg          | Lime, hydrated, packed {RoW}  market for lime, hydrated, packed   APOS, U                   |
| Soda ash                    | 2.22          | ton         | Soda ash, dense {GLO}  market for   APOS, U                                                 |
| Sulfuric acid-Purification  | 250           | kg          | Sulfuric acid {RoW} production APOS,U                                                       |
| <b>Electricity/heat</b>     |               |             |                                                                                             |
| National gas                | 11.975        | GJ          | Heat, district or industrial, natural gas, GLO, market group, APOS                          |
| Electricity-Extraction      | 10.59         | GJ          | Electricity, high voltage {RFC}  market for   APOS, U                                       |
| Electricity-Purification    | 46.746        | GJ          | Electricity, high voltage {RFC}  market for   APOS, U                                       |
| <b>Product</b>              |               |             |                                                                                             |
| LCE                         | 1             | ton         | --                                                                                          |
| <b>Emission to air</b>      |               |             |                                                                                             |
| Carbon dioxide-Extraction   | 850           | kg          | Carbon dioxide, Undefined                                                                   |
| Carbon dioxide-Purification | 104           | kg          | Carbon dioxide, Undefined                                                                   |

Table S2- Life Cycle Inventory: 1-ton LCE production through the DLE method.

| <b>Input</b>              |               |             |                                                                               |
|---------------------------|---------------|-------------|-------------------------------------------------------------------------------|
| <b>Properties</b>         | <b>Amount</b> | <b>Unit</b> | <b>Ecoinvent Unit Process (TRACI 2008)</b>                                    |
| <b>Materials/fuels</b>    |               |             |                                                                               |
| Sodium hydroxide          | 800           | kg          | Neutralising agent, sodium hydroxide-equivalent {GLO}  market for   APOS, U   |
| Lithium carbonate         | 150           | kg          | Lithium carbonate {GLO}  market for   APOS, U                                 |
| Lime                      | 520           | kg          | Quicklime, milled, loose {RoW}  market for quicklime, milled, loose   APOS, U |
| Water                     | 103.6         | ton         | Water, decarbonised {RoW}  market for water, decarbonised   APOS, U           |
| Carbon dioxide            | 600           | kg          | Carbon dioxide, liquid {RoW}  market for   APOS, U                            |
| <b>Electricity/heat</b>   |               |             |                                                                               |
| Natural gas               | 11.782        | GJ          | Heat, district or industrial, natural gas, GLO, market group, APOS            |
| Electricity-Extraction    | 3.12          | GJ          | Electricity, high voltage {RFC}  market for   APOS, U                         |
| Electricity-Purification  | 19.20         | GJ          | Electricity, high voltage {RFC}  market for   APOS, U                         |
| <b>Product</b>            |               |             |                                                                               |
| LCE                       | 1             | ton         | --                                                                            |
| <b>Emission to air</b>    |               |             |                                                                               |
| Carbon dioxide-Extraction | 670           | kg          | Carbon dioxide, Undefined                                                     |

Table S3- Life Cycle Inventory: 1-ton LCE production through the EDL method.

| <b>Input</b>             |               |             |                                                                                                                                             |
|--------------------------|---------------|-------------|---------------------------------------------------------------------------------------------------------------------------------------------|
| <b>Properties</b>        | <b>Amount</b> | <b>Unit</b> | <b>Ecoinvent Unit Process (TRACI 2008)</b>                                                                                                  |
| <b>Materials/fuels</b>   |               |             |                                                                                                                                             |
| Soda ash                 | 1.4           | ton         | Soda ash, dense {GLO}  market for   APOS, U                                                                                                 |
| Lithium carbonate        | 5             | kg          | Lithium carbonate {GLO}  market for   APOS, U                                                                                               |
| Water                    | 4.1           | ton         | Water, decarbonised {RoW}  market for water, decarbonised   APOS, U                                                                         |
| Calcium hydroxide        | 150           | kg          | Lime, hydrated, packed {RoW}  market for lime, hydrated, packed   APOS, U                                                                   |
| Hydrogen peroxide        | 150           | kg          | Hydrogen peroxide, without water, in 50% solution state {RoW}  market for hydrogen peroxide, without water, in 50% solution state   APOS, U |
| Sulfuric acid            | 1.2           | ton         | Sulfuric acid {RoW}  market for sulfuric acid   APOS, U                                                                                     |
| Electrode                | 0.05 kg       |             | Gold {GLO}  market for   APOS, U                                                                                                            |
|                          | Gold          |             |                                                                                                                                             |
|                          | 7.54 kg       |             |                                                                                                                                             |
|                          | Carbon        |             | Carbon black {GLO}  market for   APOS, U                                                                                                    |
| <b>Electricity/heat</b>  |               |             |                                                                                                                                             |
| Electricity-Extraction   | 1.19          | GJ          | Electricity, high voltage {RFC}  market for   APOS, U                                                                                       |
| Electricity-Purification | 2.06          | GJ          | Electricity, high voltage {RFC}  market for   APOS, U                                                                                       |
| <b>Product</b>           |               |             |                                                                                                                                             |
| LCE                      | 1             | ton         | --                                                                                                                                          |

**Energy:** In all methods illustrated in Fig. S1, we used laboratory-scale data to estimate the specifications of equipment necessary for industrial-scale operations, including reactor dimensions and insulation materials, to determine the heating energy requirements of the chemical processes. For example, glass fiber was selected as the reactor wall insulation to reduce heat loss. The total heating energy includes (i) the energy needed to elevate the temperature of the reaction mixture and (ii) the energy lost through heat transfer across the reactor walls. Eq. S1 was applied to calculate the heating energy required for the magnets recycling process.

$$Q = \frac{mC_p\Delta T + A\frac{K_a}{s}\Delta T t}{\eta_H}$$

S1

Where  $C_p$  is the specific heat capacity (J/kg.K) at room temperature, as assumed for the preliminary analysis in this study,  $m$  is the mass of the reaction mixture (kg),  $\Delta T$  is the temperature difference between the target reaction temperature (K) and room temperature, and  $A$  represents the surface area of the furnace/reactor.  $K_a$  is the thermal conductivity of the insulation material,  $s$  is the insulation thickness, and  $t$  is the reaction time. The efficiency of the heating element,  $\eta_H$ , is assumed to be 75%. The rate of heat loss, calculated as  $AK_a/s$ , is estimated to be 3.3 W/K [1].

During the leaching stage, an agitator is required to ensure adequate mixing of chemical components, which involves energy consumption. For industrial-scale operations, agitation speed was estimated using a geometric scale-up method that maintains a constant power-to-volume ratio [2]. Cylindrical reactors or tanks were chosen for large-scale setups, with scaling based on the rotational speed observed in lab-scale experiments. The energy required for agitation was calculated using the following equation [1].

$$E = \frac{N_p \rho N^3 d^5 t}{\eta_s}$$

S2

Where  $E$  is the required energy (J),  $N_p$  is the dimensionless impeller power number derived from the theory of similarity. For this study, an axial flow impeller was assumed, with a power number of 0.79.  $\rho$ , represents the density of the mixture ( $\text{kg/m}^3$ ), and  $\eta_s$  is the stirring efficiency, which is assumed to be 80%.

In this paper, an average energy consumption of 5.5 kWh/ton of dry material [1] (i.e., material with all moisture content removed) was estimated for filtration in industrial-scale operations.

Drying of solids involves the evaporation of residual moisture that remains after upstream steps such as filtration. The energy efficiency of drying varies significantly depending on the type of dryer, its configuration, and whether heat recovery is implemented. Reported efficiencies can range from as low as 30% to over 100% in systems with effective heat recovery [3].

The dryer efficiency ( $\eta_d$ ) is defined as the ratio of the heat needed to vaporize the removed liquid to the total heat input. Only the energy required to raise the liquid temperature is explicitly considered, as other losses are accounted for within the efficiency itself. For modeling purposes, a standard efficiency of 80% is assumed based on expert estimates. Heat required for drying is calculated based on the following equation:

$$Q_d = \frac{m_{liq} C_{p_{liq}} (T_{boil} - T_0) + \Delta H_{vap} m_{vap}}{\eta_d}$$

S3

Where,  $m_{liq}$  (kg), is mass of liquid present in the wet solid before drying,  $C_{p_{liq}}$  (J/kg.K), is specific heat capacity of the liquid to be evaporated,  $T_0$ , reference temperature (K),  $T_{boil}$  (K), is boiling temperature of the liquid,  $\Delta H_{vap}$  (J/kg), is latent heat of vaporization of the liquid at the boiling temperature,  $m_{vap}$  (kg), is mass of liquid actually evaporated during drying. Similarly, energy is required to raise the temperature of the liquid to the boiling temperature plus its enthalpy of evaporation (S3).

Equipment prices were initially estimated using the Matches [4]. These baseline costs (from 2014) were updated to 2025 prices using established cost-index inflation factors. Specifically, we adjusted each 2014 equipment cost by the ratio of the 2025 to 2014 from the CEPCI index value, following standard industry practice.

Table S4- Equipment list 1-ton LCE production from concentrated hard rock by conventional method.

| <b>Equipment list</b>                                  | <b>Number</b> | <b>Price<br/>(k\$)</b> |
|--------------------------------------------------------|---------------|------------------------|
| Rotary kiln, CS                                        | 1             | 776.07                 |
| Vessel Reactor, SS316                                  | 1             | 415.84                 |
| Stirring heated reactor, 1000                          | 2             | 193.28                 |
| Filter press, SS316                                    | 1             | 200.75                 |
| Stirring reactor, 800 L                                | 2             | 88.68                  |
| Filtration                                             | 1             | 84.76                  |
| Evaporator                                             | 1             | 108.64                 |
| Precipitation stirring jacket reactor                  | 1             | 15.56                  |
| Tank, 1000 L                                           | 2             | 14.70                  |
| Filter press-3                                         | 1             | 84.76                  |
| Carbonate removal stirring jacket reactor, 500 L SS316 | 1             | 66.26                  |
| Tank, 500 L                                            | 4             | 11.39                  |
| Evaporator-2                                           | 1             | 64.92                  |
| Filter press-3                                         | 1             | 73.86                  |
| Stirring heated reactor, 250 L, SS316                  | 1             | 45.93                  |
| Filter pree-4                                          | 1             | 51.57                  |
| Dryer                                                  | 1             | 159.60                 |

Table S5- Equipment list 1-ton LCE production from concentrated hard rock by the DLE method.

| <b>Equipment list</b>                                         | <b>Number</b> | <b>Price<br/>(k\$)</b> |
|---------------------------------------------------------------|---------------|------------------------|
| Rotary kiln                                                   | 1             | 576.54                 |
| Agitated reactor                                              | 2             | 164.62                 |
| Storage tank (4k G)                                           | 4             | 199.41                 |
| Filterpress-1                                                 | 1             | 119.06                 |
| Rotary kiln, CS                                               | 1             | 199.16                 |
| Agitated reactor                                              | 2             | 215.82                 |
| Filterpress-2                                                 | 1             | 130.81                 |
| Nanofiltration                                                | 1             | 108.64                 |
| Precipitation stirring jacket reactor- CO <sub>2</sub> bubble | 2             | 52.30                  |
| Tank, 1000 L                                                  | 2             | 14.70                  |
| Filterpress-3                                                 | 1             | 73.86                  |
| Dryer                                                         | 1             | 159.60                 |
| NaOH-recovery stirring jacket reactor                         | 2             | 66.39                  |
| Filterpress-4                                                 | 1             | 95.91                  |

Table S6- Equipment list 1-ton LCE production from concentrated hard rock by the EDL method.

| <b>Equipment list</b>   | <b>Number</b> | <b>Price<br/>(k\$)</b> |
|-------------------------|---------------|------------------------|
| Mixing tank             | 1             | 552.2                  |
| Electrochemical reactor | 2             | 1,676.5                |
| Storage tank            | 4             | 199.41                 |
| Filterpress-1           | 1             | 118.21                 |
| Clarification reactor   | 1             | 103.25                 |



|                       |   |        |
|-----------------------|---|--------|
| Precipitation reactor | 1 | 112.07 |
| Filterpress-2         | 1 | 130.81 |
| Washing tank          | 1 | 46.05  |
| Dryer                 | 1 | 159.60 |
| Evaporator            | 1 | 66.38  |
| Filterpress-4         | 1 | 95.91  |

Table S7: Factors for estimation of fixed capital investment (FCI) for plant [5].

| Capital investment     | Value            |
|------------------------|------------------|
| Equipment cost (EC)    | Tables 3&4       |
| Installation cost (IC) | $0.70 \times EC$ |
| Instrumentation        | $0.18 \times EC$ |
| Electrical             | $0.10 \times EC$ |
| Buildings              | $0.28 \times EC$ |
| Yard improvement       | $0.10 \times EC$ |
| Auxiliary facilities   | $0.10 \times EC$ |
| <b>Other costs</b>     |                  |
| Contingency            | $0.05 \times EC$ |

The operating labor hours per ton for each processing step (Y) were estimated based on plant capacity (X, in tons per day) using the empirical correlation shown in Equation S1.

$$\log_{10} Y = 0.783 \log_{10} X + 1.384$$

S4

Y: The operating labor hours per ton per processing step

X: Plant capacity, tons per day

Table S8: Assumptions for estimation of indirect OPEX [5,6].

| Cost category | Cost estimation method                            |
|---------------|---------------------------------------------------|
| Maintenance   | $0.03 \times FCI$                                 |
| Depreciation  | Modified Accelerated Cost Recovery System (MACRS) |
| Insurance     | $0.03 \times \text{Total Capital Cost (CAPEX)}$   |

Table S9- Chemicals and utility costs required to supply per ton/day or kWh/day production of 1-ton LCE through the conventional method from concentrated hard rock [7,8].

| Item                | Qty.                | Unit price<br>(\$/per unit) | Total price<br>(\$) |
|---------------------|---------------------|-----------------------------|---------------------|
| Acid, Sulfuric, 96% | 2.12 t              | 327 (\$/t)                  | 703.0               |
| Water               | 12.9 m <sup>3</sup> | 1 (\$/m <sup>3</sup> )      | 12.9                |
| Calcium carbonate   | 0.42 t              | 225 (\$/t)                  | 94.5                |
| Lime milk           | 0.278 t             | 220 (\$/t)                  | 61.1                |
| Soda ash            | 1.63 t              | 229                         | 373.5               |
| Natural Gas         | 311 m <sup>3</sup>  | 0.381 \$/m <sup>3</sup>     | 118.4               |
| Electricity         | 6377.6 kWh          | 0.1 (\$/kWh)                | 637.7               |

Table S10- Chemicals and utility costs required to supply per ton/day or kWh/day production of 1-ton LCE through the DLE method from concentrated hard rock [7,8].

| Item            | Qty.                | Unit price<br>(\$/per unit) | Total price<br>(\$) |
|-----------------|---------------------|-----------------------------|---------------------|
| NaOH            | 0.8 t               | 400 (\$/t)                  | 320                 |
| Water           | 98.4 m <sup>3</sup> | 1 (\$/m <sup>3</sup> )      | 98.4                |
| Lime            | 0.52 t              | 385 (\$/t)                  | 200.2               |
| Filter          | 68 m <sup>2</sup>   | 0.15 (\$/m <sup>2</sup> )   | 10.3                |
| LCE             | 0.015 t             | 14000 (\$/t)                | 210                 |
| CO <sub>2</sub> | 0.6 t               | 305 (\$/t)                  | 183                 |
| Natural Gas     | 308 m <sup>3</sup>  | 0.381 \$/m <sup>3</sup>     | 117.3               |
| Electricity     | 4534.9 kWh          | 0.1 (\$/kWh)                | 453.4               |

Table S11- Chemicals and utility costs required to supply per ton/day or kWh/day production of 1-ton LCE through the EDL method from concentrated hard rock [7,8].

| Item                           | Qty.                | Unit price<br>(\$/per unit) | Total price<br>(\$) |
|--------------------------------|---------------------|-----------------------------|---------------------|
| H <sub>2</sub> SO <sub>4</sub> | 1.2 t               | 327 (\$/t)                  | 392.4               |
| Water                          | 4.0 m <sup>3</sup>  | 1 (\$/m <sup>3</sup> )      | 4                   |
| Soda ash                       | 1.43 m <sup>2</sup> | 229 (\$/t)                  | 10.3                |
| LCE                            | 0.015 t             | 14000 (\$/t)                | 420                 |
| Electrode-makeup               | 5 kg                | 180 (\$/kg)                 | 900                 |
| H <sub>2</sub> O <sub>2</sub>  | 0.1 t               | 900 \$/t                    | 90                  |
| Electricity                    | 3266.4 kWh          | 0.1 (\$/kWh)                | 326.6               |

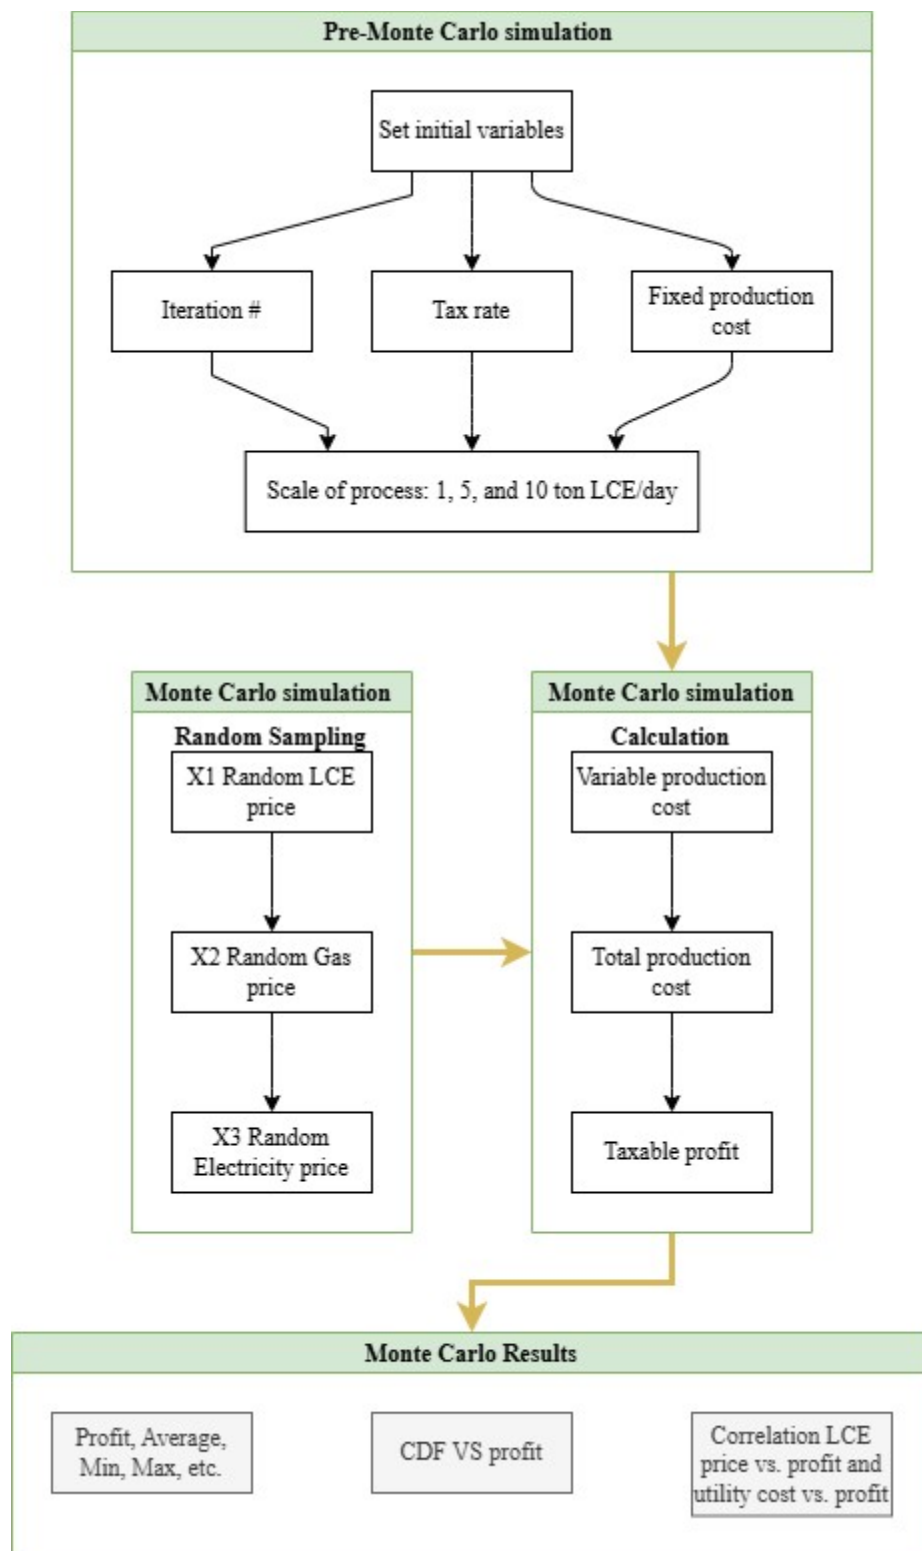

Fig. S1. Schematic workflow of the Monte Carlo simulation process.

## LCA Results

Table S12- Impact categories associated with the conventional method, evaluated per 1 ton of LCE produced.

| TRACI                            | Unit                | Natural<br>gas-<br>Calcination | Sulfuric<br>acid | Water    | Direct<br>Emission | Calcium<br>Carbonate-<br>Water<br>leaching | Lime<br>milk | Sulfuric<br>acid | Direct<br>Emission | Sodium<br>carbonate-<br>Total | Electricity-<br>Total |
|----------------------------------|---------------------|--------------------------------|------------------|----------|--------------------|--------------------------------------------|--------------|------------------|--------------------|-------------------------------|-----------------------|
| <b>Ozone depletion</b>           | kg<br>CFC-<br>11 eq | 1.46E-04                       | 2.87E-05         | 1.07E-07 | 0.00E+00           | 1.58E-05                                   | 1.74E-05     | 2.36E-06         | 0.00E+00           | 1.67E-04                      | 5.0E-04               |
| <b>Global warming</b>            | kg<br>CO2<br>eq     | 9.22E+02                       | 1.98E+02         | 1.04E+00 | 8.50E+02           | 1.52E+02                                   | 2.67E+02     | 2.80E+01         | 1.04E+02           | 2.71E+03                      | 8.2E+03               |
| <b>Smog</b>                      | kg O3<br>eq         | 1.47E+01                       | 1.62E+01         | 6.64E-02 | 0.00E+00           | 1.30E+01                                   | 6.13E+00     | 1.73E+00         | 0.00E+00           | 1.70E+02                      | 2.3E+02               |
| <b>Acidification</b>             | kg<br>SO2<br>eq     | 8.88E-01                       | 1.56E+01         | 5.22E-03 | 0.00E+00           | 9.02E-01                                   | 3.74E-01     | 2.09E+00         | 0.00E+00           | 1.16E+01                      | 2.7E+01               |
| <b>Eutrophication</b>            | kg N<br>eq          | 2.45E-01                       | 8.35E-01         | 3.14E-02 | 0.00E+00           | 3.64E-01                                   | 1.50E-01     | 1.09E-01         | 0.00E+00           | 1.33E+01                      | 3.2E+01               |
| <b>Carcinogenics</b>             | CTUh                | 1.66E-05                       | 4.57E-05         | 7.40E-07 | 0.00E+00           | 2.22E-05                                   | 2.70E-06     | 7.88E-06         | 0.00E+00           | 2.49E-04                      | 5.0E-04               |
| <b>Non<br/>carcinogenics</b>     | CTUh                | 2.54E-05                       | 7.28E-04         | 1.52E-06 | 0.00E+00           | 6.36E-05                                   | 9.48E-06     | 1.67E-05         | 0.00E+00           | 7.68E-04                      | 1.5E-03               |
| <b>Respiratory<br/>effects</b>   | kg<br>PM2.5<br>eq   | 1.13E-01                       | 1.02E+00         | 7.72E-04 | 0.00E+00           | 1.36E-01                                   | 5.45E-02     | 1.46E-01         | 0.00E+00           | 2.11E+00                      | 8.2E+00               |
| <b>Ecotoxicity</b>               | CTUe                | 1.96E+03                       | 1.27E+04         | 2.33E+01 | 0.00E+00           | 4.55E+03                                   | 3.54E+02     | 1.57E+03         | 0.00E+00           | 5.07E+04                      | 4.5E+04               |
| <b>Fossil fuel<br/>depletion</b> | MJ<br>surplus       | 2.40E+03                       | 7.66E+02         | 1.47E+00 | 0.00E+00           | 2.56E+02                                   | 1.76E+02     | 1.81E+02         | 0.00E+00           | 3.21E+03                      | 7.2E+03               |

Table S13- Impact categories associated with the DLE method, evaluated per 1 ton of LCE produced.

| TRACI                 | Unit                    | NaOH    | Natural gas-total | Direct Emission | Water    | Lime    | LCE      | CO <sub>2</sub> Reactor | Electricity-Total |
|-----------------------|-------------------------|---------|-------------------|-----------------|----------|---------|----------|-------------------------|-------------------|
| Ozone depletion       | kg CFC-11 eq            | 5.6E-04 | 1.43E-04          | 0.00E+00        | 8.62E-07 | 9.5E-02 | 1.35E-04 | 1.94E-05                | 2.0E-04           |
| Global warming        | kg CO <sub>2</sub> eq   | 9.4E+02 | 9.07E+02          | 6.70E+02        | 8.39E+00 | 6.0E+02 | 1.13E+03 | 4.94E+02                | 3.2E+03           |
| Smog                  | kg O <sub>3</sub> eq    | 6.2E+01 | 1.45E+01          | 0.00E+00        | 5.34E-01 | 9.2E+00 | 1.01E+02 | 7.14E+01                | 9.1E+01           |
| Acidification         | kg SO <sub>2</sub> eq   | 5.1E+00 | 8.74E-01          | 0.00E+00        | 4.19E-02 | 6.3E-01 | 8.77E+00 | 1.43E+00                | 1.0E+01           |
| Eutrophication        | kg N eq                 | 3.7E+00 | 2.41E-01          | 0.00E+00        | 2.53E-01 | 1.8E-01 | 1.24E+01 | 1.15E+00                | 1.2E+01           |
| Carcinogenics         | CTUh                    | 9.7E-05 | 1.63E-05          | 0.00E+00        | 5.94E-06 | 4.8E-06 | 1.08E-04 | 4.73E-05                | 2.0E-04           |
| Non carcinogenics     | CTUh                    | 3.4E-04 | 2.50E-05          | 0.00E+00        | 1.22E-05 | 3.3E-05 | 5.47E-04 | 1.08E-04                | 5.9E-04           |
| Respiratory effects   | kg PM <sub>2.5</sub> eq | 1.3E+00 | 1.11E-01          | 0.00E+00        | 6.20E-03 | 9.5E-02 | 1.45E+00 | 3.86E-01                | 3.2E+00           |
| Ecotoxicity           | CTUe                    | 1.8E+04 | 1.93E+03          | 0.00E+00        | 1.87E+02 | 1.1E+03 | 2.83E+04 | 8.10E+03                | 1.8E+04           |
| Fossil fuel depletion | MJ surplus              | 7.4E+02 | 2.36E+03          | 0.00E+00        | 1.18E+01 | 3.5E+02 | 1.35E+03 | 4.03E+02                | 2.8E+03           |

Table S14- Impact categories associated with the EDL method, evaluated per 1 ton of LCE produced.

| TRACI                 | Unit         | Soda ash | Water   | Lime hydrate | LCE     | Sulfuric acid | Hydrogen peroxide | Electrode | Electricity-<br>Total |
|-----------------------|--------------|----------|---------|--------------|---------|---------------|-------------------|-----------|-----------------------|
| Ozone depletion       | kg CFC-11 eq | 1.1E-04  | 3.4E-08 | 9.4E-06      | 4.5E-06 | 2.3E-05       | 1.9E-05           | 2.7E-04   | 1.0E-04               |
| Global warming        | kg CO2 eq    | 1.7E+03  | 3.3E-01 | 1.4E+02      | 3.8E+01 | 1.9E+02       | 2.2E+02           | 4.0E+03   | 1.7E+03               |
| Smog                  | kg O3 eq     | 1.1E+02  | 2.1E-02 | 3.3E+00      | 3.4E+00 | 2.9E+01       | 1.1E+01           | 2.0E+02   | 4.8E+01               |
| Acidification         | kg SO2 eq    | 7.4E+00  | 1.7E-03 | 2.0E-01      | 2.9E-01 | 9.3E+00       | 8.7E-01           | 2.4E+01   | 5.5E+00               |
| Eutrophication        | kg N eq      | 8.6E+00  | 1.0E-02 | 8.1E-02      | 4.1E-01 | 2.7E+00       | 6.8E-01           | 1.9E+01   | 6.6E+00               |
| Carcinogenics         | CTUh         | 1.6E-04  | 2.4E-07 | 1.5E-06      | 3.6E-06 | 7.2E-05       | 5.9E-05           | 4.0E-04   | 1.0E-04               |
| Non carcinogenics     | CTUh         | 4.9E-04  | 4.8E-07 | 5.1E-06      | 1.8E-05 | 1.3E-03       | 7.2E-05           | 2.2E-03   | 3.1E-04               |
| Respiratory effects   | kg PM2.5 eq  | 1.4E+00  | 2.5E-04 | 2.9E-02      | 4.8E-02 | 7.8E-01       | 2.0E-01           | 4.1E+00   | 1.7E+00               |
| Ecotoxicity           | CTUe         | 3.3E+04  | 7.4E+00 | 1.9E+02      | 9.4E+02 | 8.3E+04       | 4.4E+03           | 1.3E+05   | 9.2E+03               |
| Fossil fuel depletion | MJ surplus   | 2.1E+03  | 4.7E-01 | 9.5E+01      | 4.5E+01 | 4.1E+02       | 3.5E+02           | 4.4E+03   | 1.5E+03               |

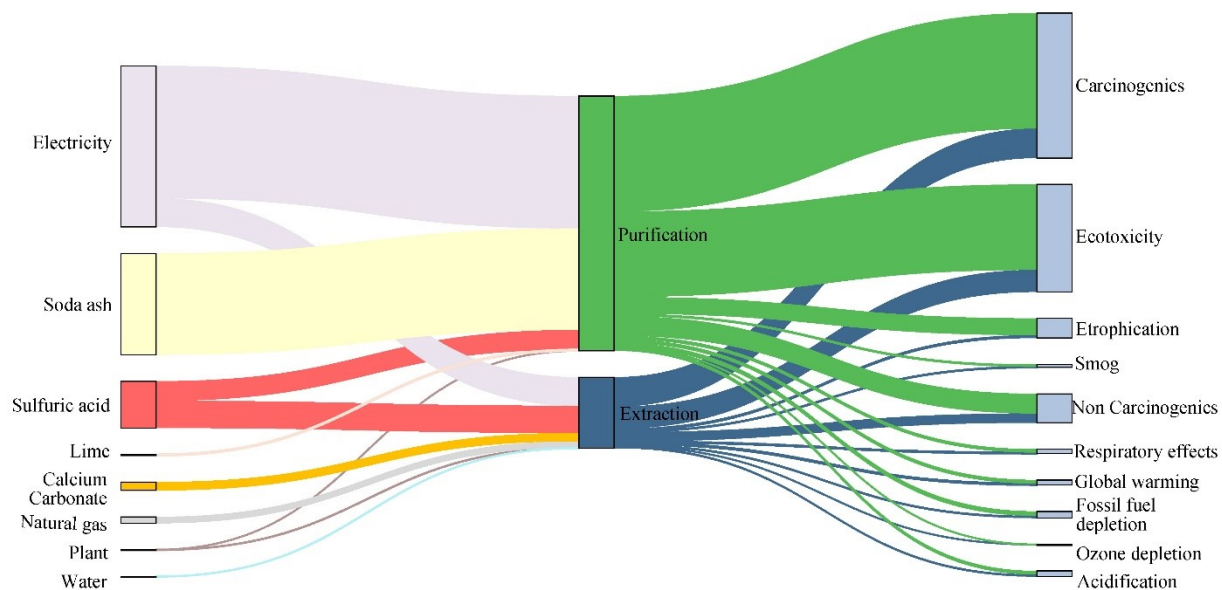

Fig S2. Normalized LCA results based on TRACI impact categories for 1-ton LCE production from the conventional method from hard rock.

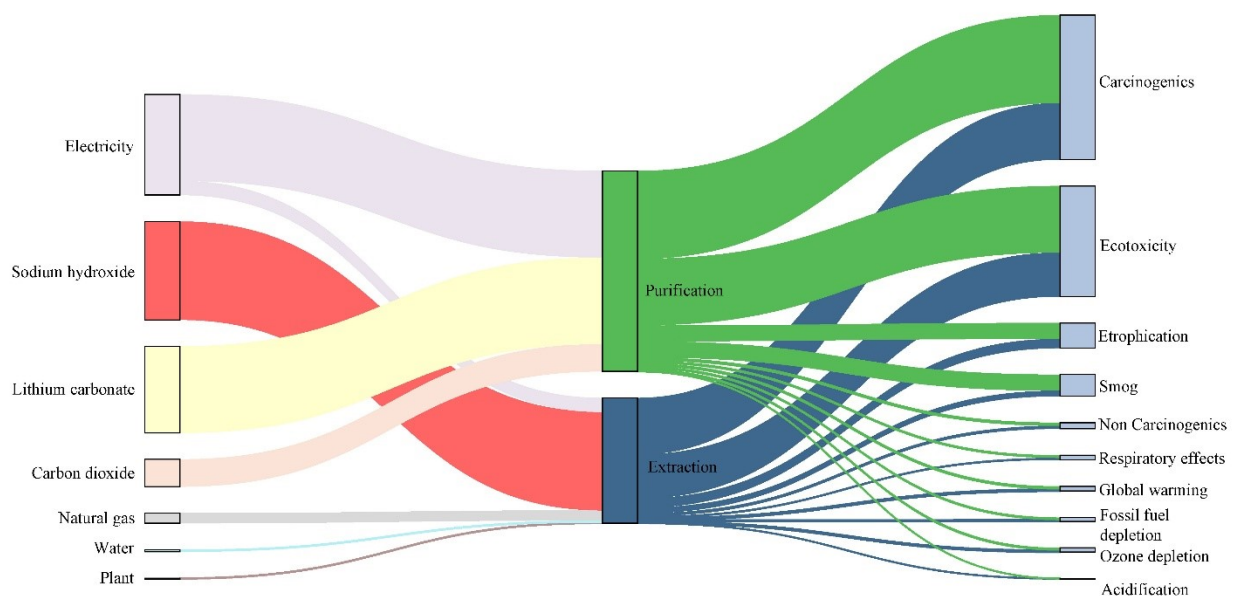

Fig S3. Normalized LCA results based on TRACI impact categories for 1-ton LCE production from the DLE method from hard rock.

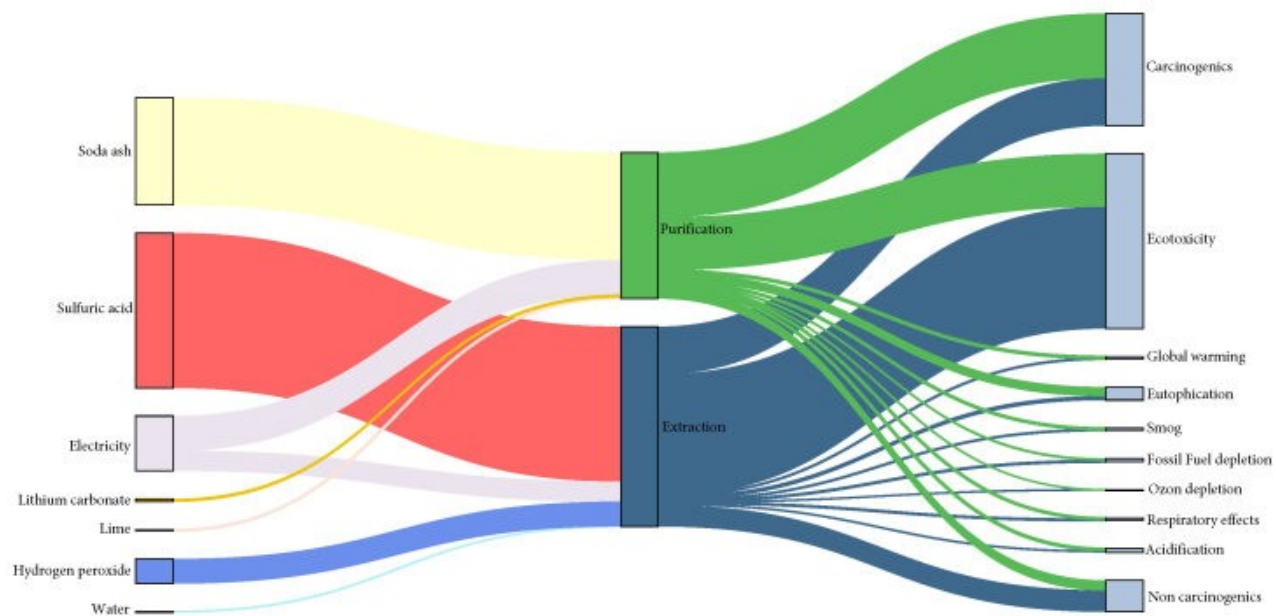

Fig S4. Normalized LCA results based on TRACI impact categories for 1-ton LCE production from the EDL method from hard rock.



TEA Results:

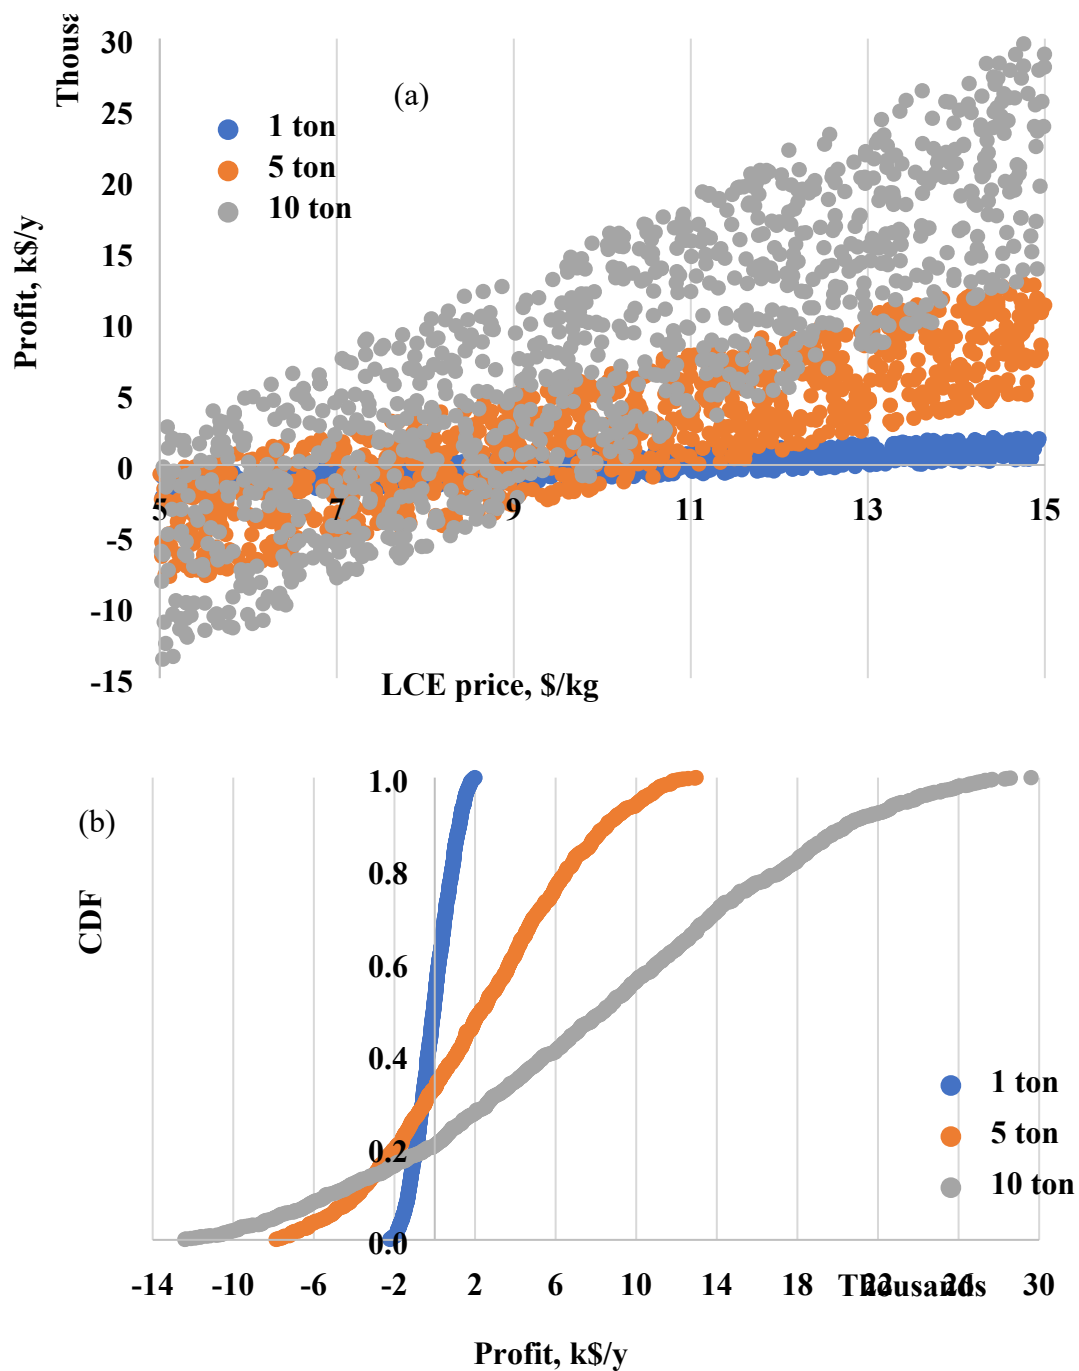

Fig. S5. Profit vs. LCE price for different production scales (a), and CDFs of annual profit for 1, 5, and 10 tons/day LCE production for the conventional method.

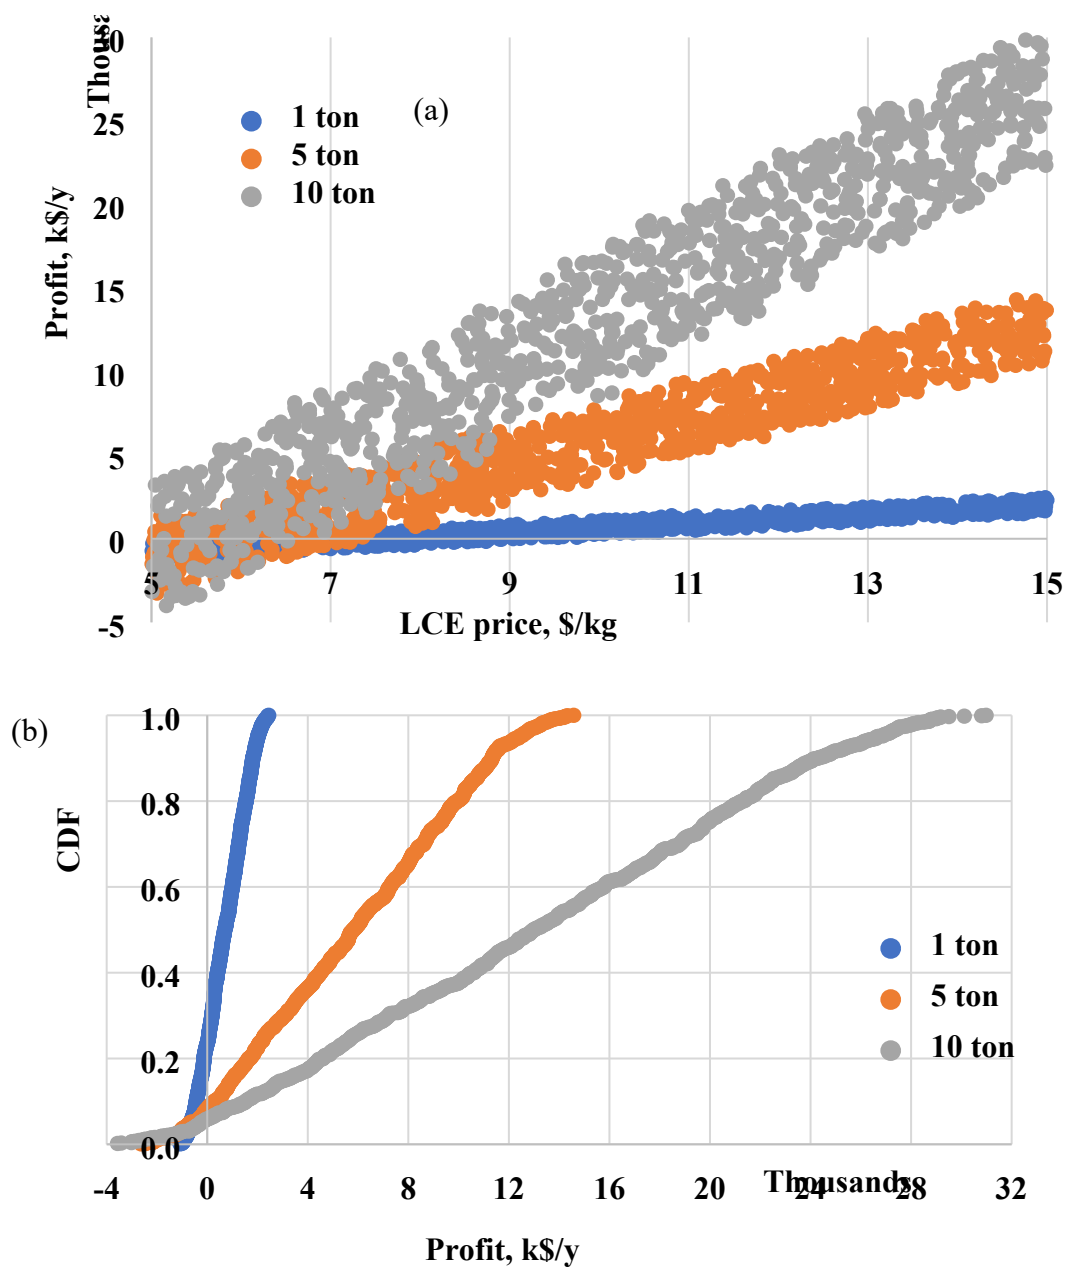

Fig. S6. Profit vs. LCE price for different production scales (a), and CDFs of annual profit for 1, 5, and 10 tons/day LCE production for the DLE method.

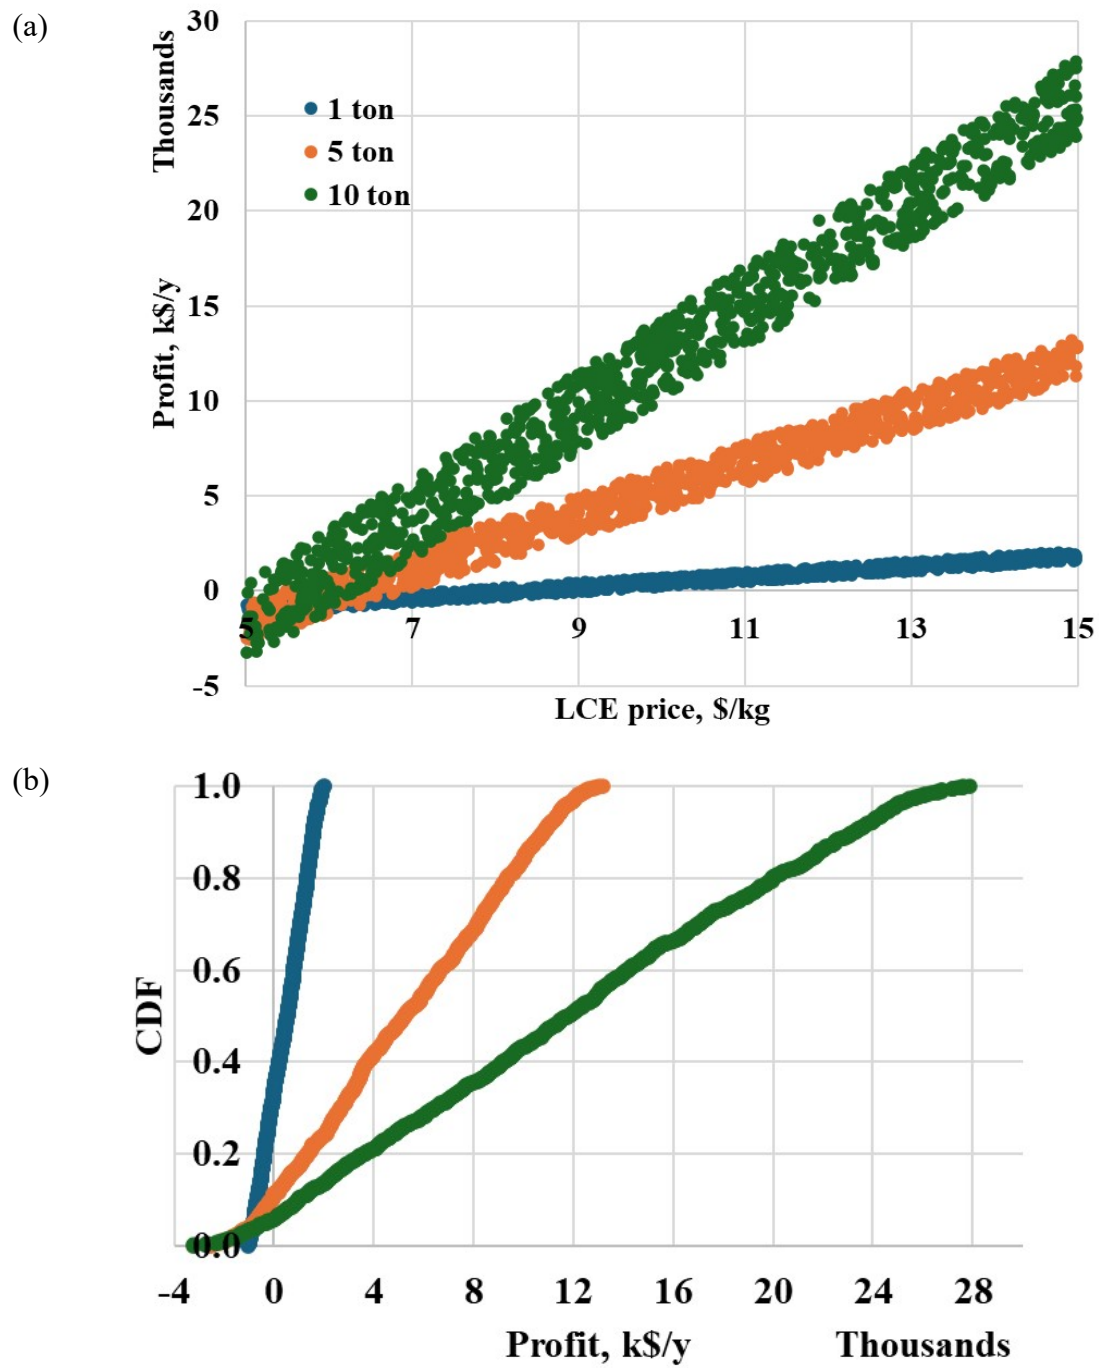

Fig. S7. Profit vs. LCE price for different production scales (a), and CDFs of annual profit for 1, 5, and 10 tons/day LCE production for the EDL method.

## References:

- [1] Piccinno, F., Hischer, R., Seeger, S. and Som, C., 2016. From laboratory to industrial scale: a scale-up framework for chemical processes in life cycle assessment studies. *Journal of Cleaner Production*, 135, pp.1085-1097.
- [2] Coker, A.K., 2001. Modeling of chemical kinetics and reactor design. Gulf Professional Publishing.
- [3] Grant, C.D., 2000. Energy management in chemical industry. *Ullmann's Encyclopedia of Industrial Chemistry*.
- [4] Matche. "Cost of Equipment: Preliminary Cost Estimates." Accessed [4, 2025]. <https://www.matche.com/equipcost/>.
- [5] Silla, H., 2003. Chemical process engineering: design and economics. CRC Press.
- [6] Turton, R., Bailie, R.C., Whiting, W.B. and Shaeiwitz, J.A., 2008. Analysis, synthesis and design of chemical processes. Pearson Education.
- [7] Ulrich, G.D. and Vasudevan, P.T., 2006. How to estimate utility costs. *Chem. Eng*, 113(4), pp.66-69.
- [8] Cornell University, NY. Chemistry Storeroom Chemical Inventory Price List 2024. Internal document. (Access 6/2025).
